# Supplementary figures and images for: A precisely adjustable, variation-suppressed eukaryotic transcriptional controller to enable genetic discovery
Source: eLife journal article supplement (doi:10.7554/elife.69549), 2021-08-03

**A**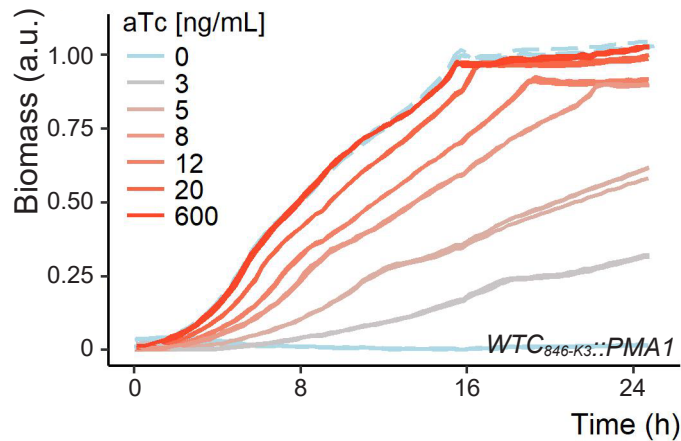**B**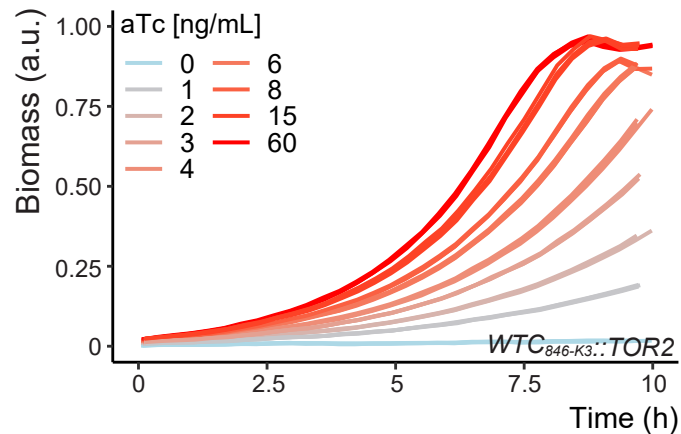**C**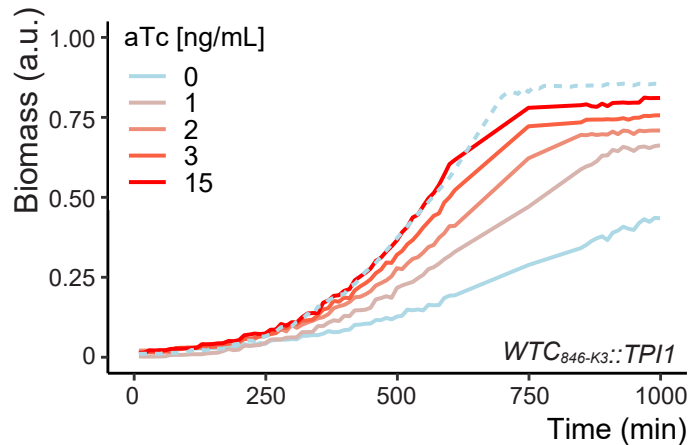**D**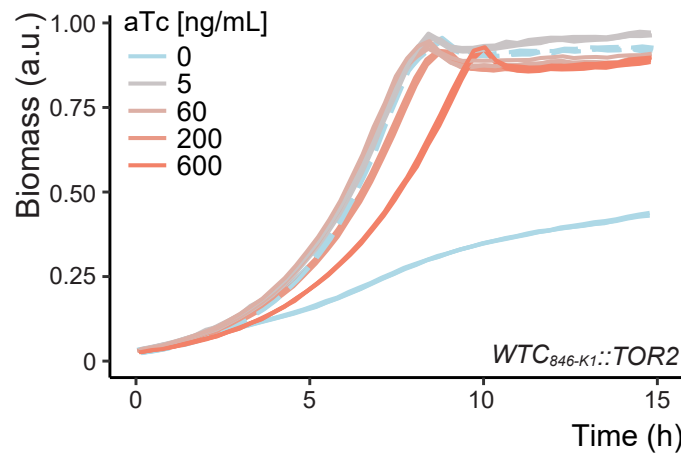

Supplement: supp [file elife-69549-supp-v1.zip]

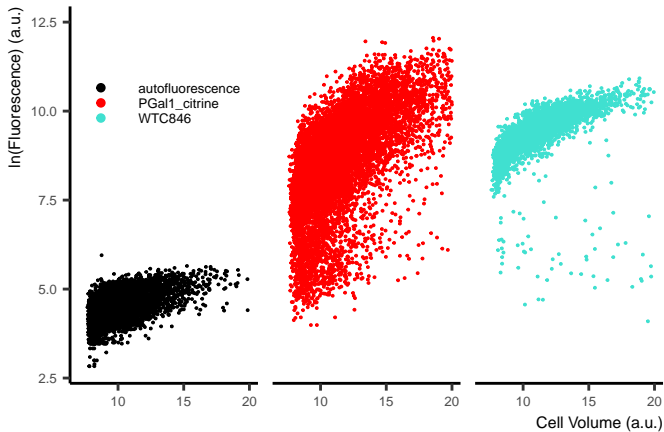

Supplement: supp [file elife-69549-supp-v1.zip]

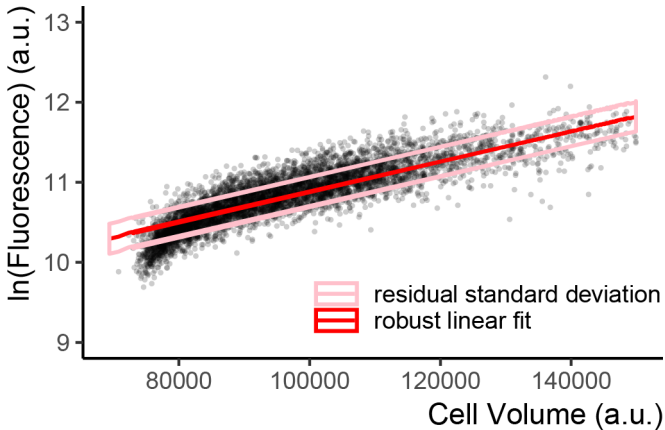

Supplement: supp [file elife-69549-supp-v1.zip]

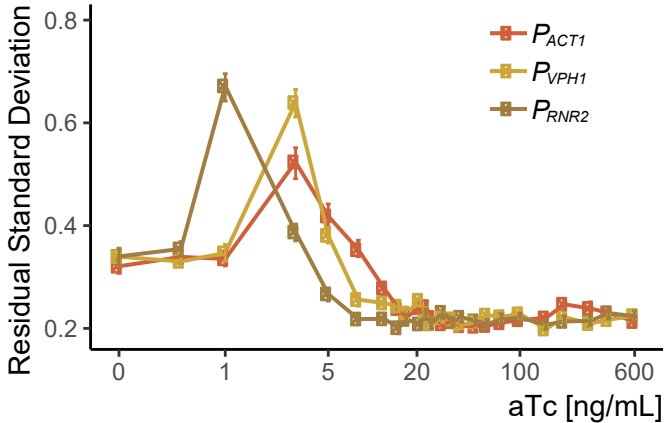

Supplement: supp [file elife-69549-supp-v1.zip]

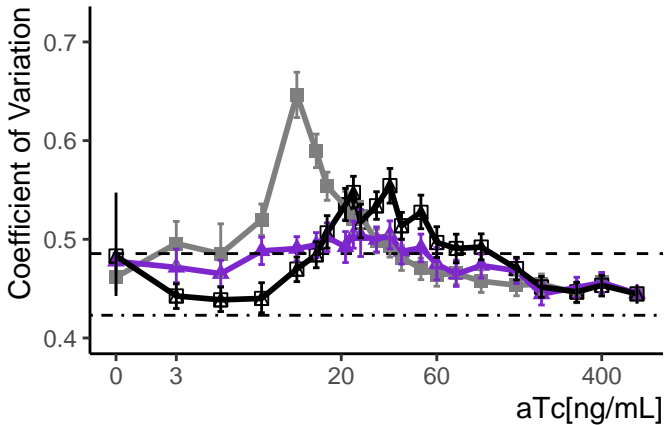

Supplement: supp [file elife-69549-supp-v1.zip]

**A**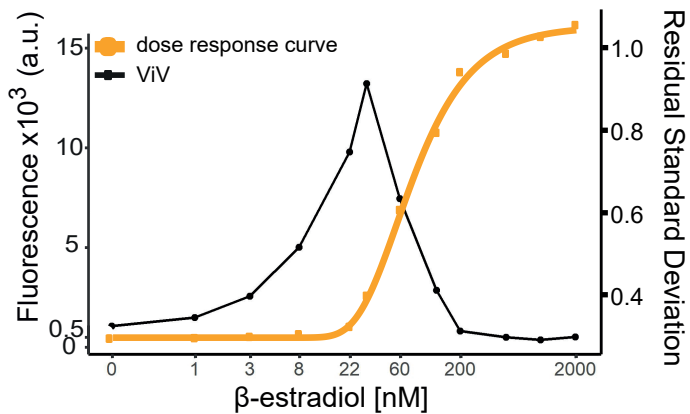**B**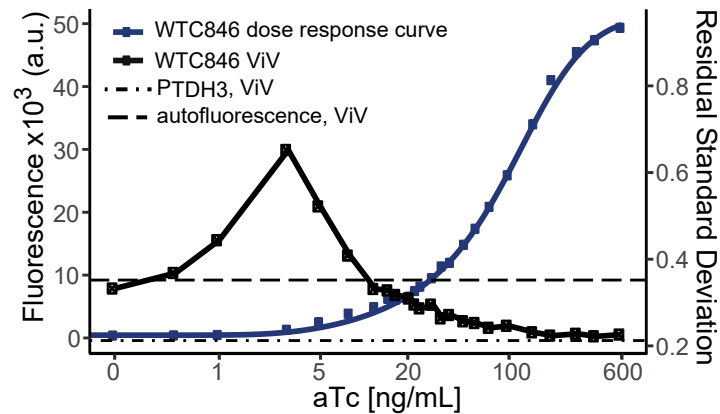**C**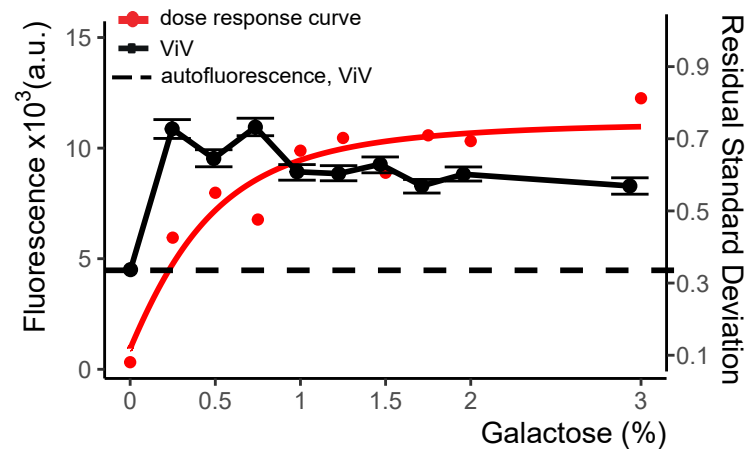

Supplement: supp [file elife-69549-supp-v1.zip]

**A**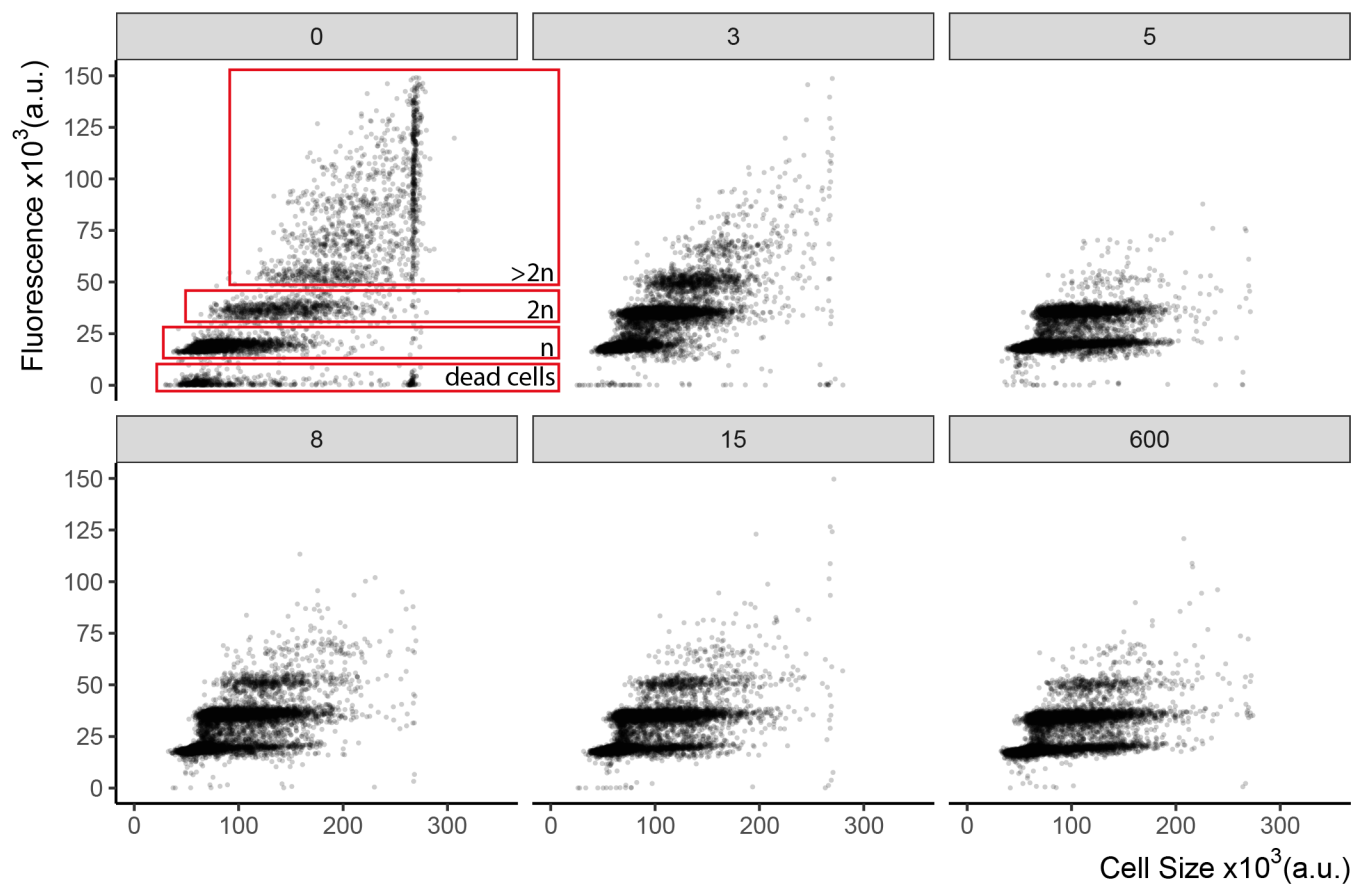**B**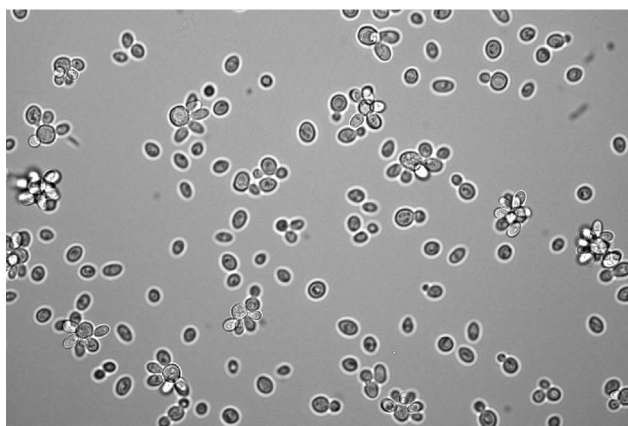

Supplement: supp [file elife-69549-supp-v1.zip]

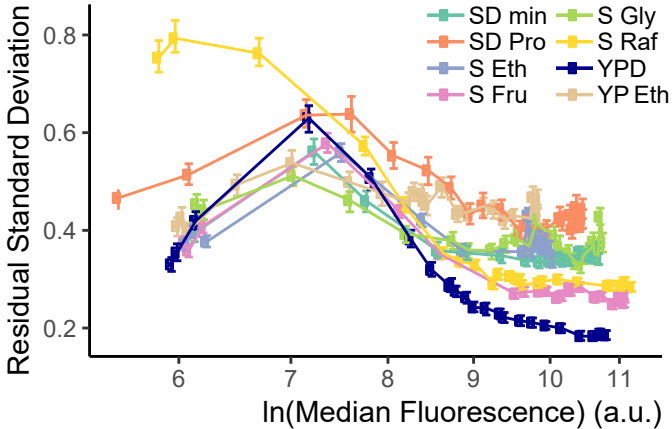

Supplement: supp [file elife-69549-supp-v1.zip]

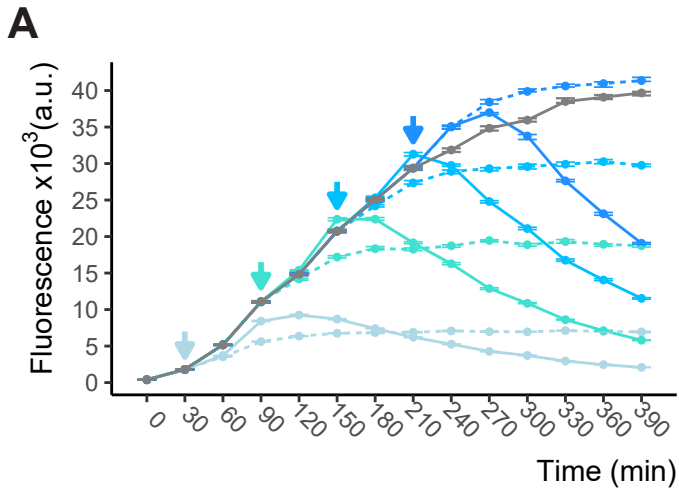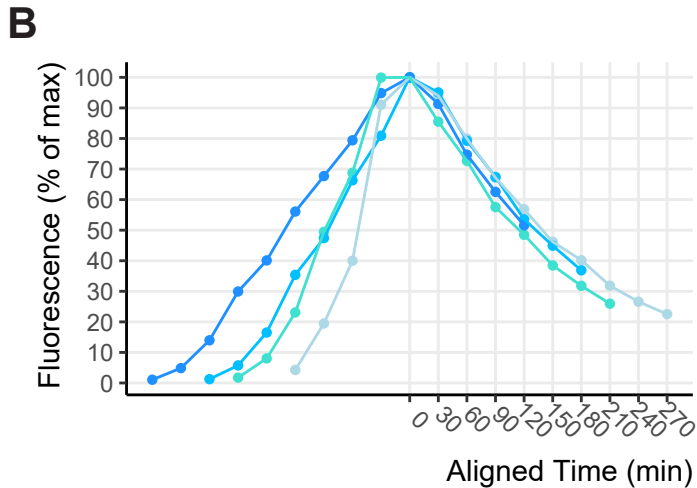

Supplement: supp [file elife-69549-supp-v1.zip]

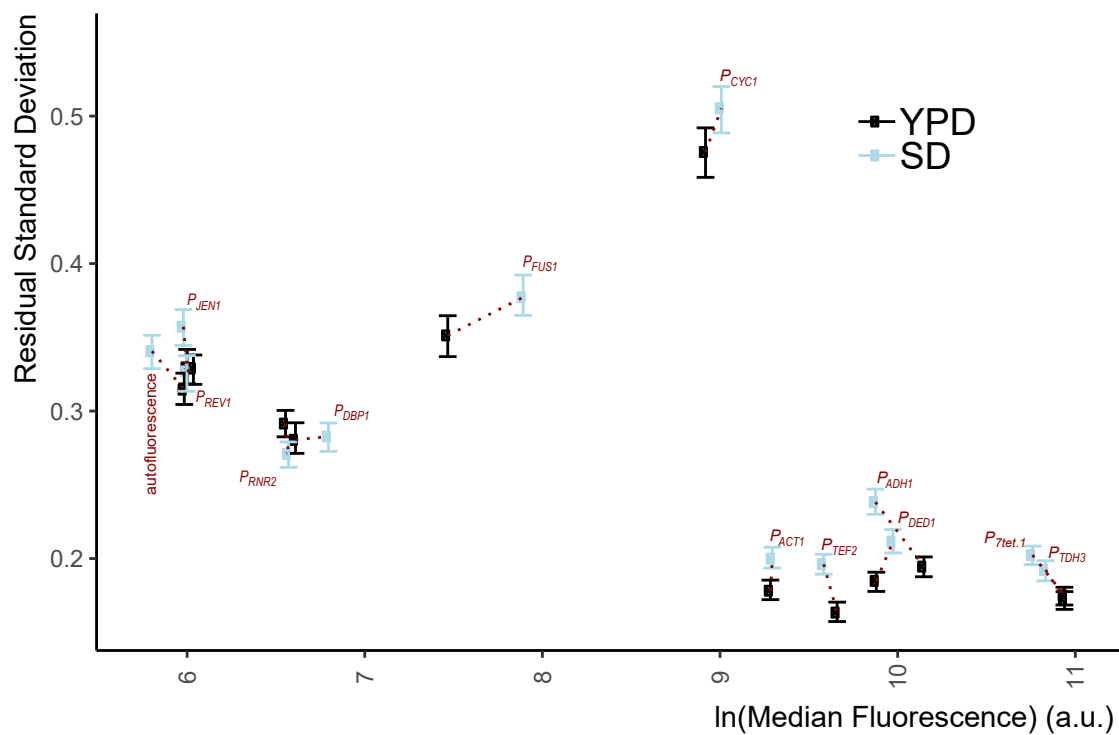

Supplement: supp [file elife-69549-supp-v1.zip]

**A**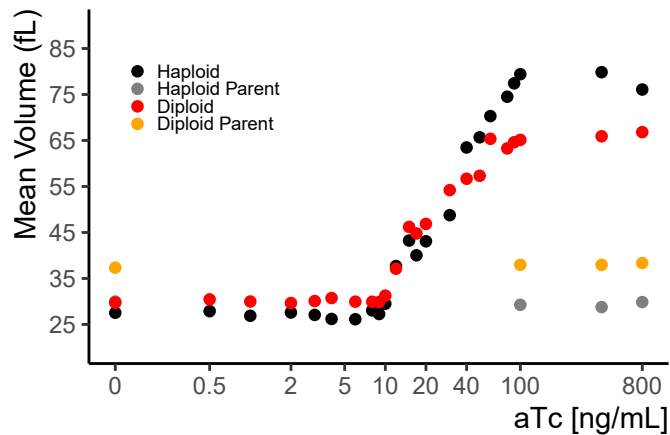**B**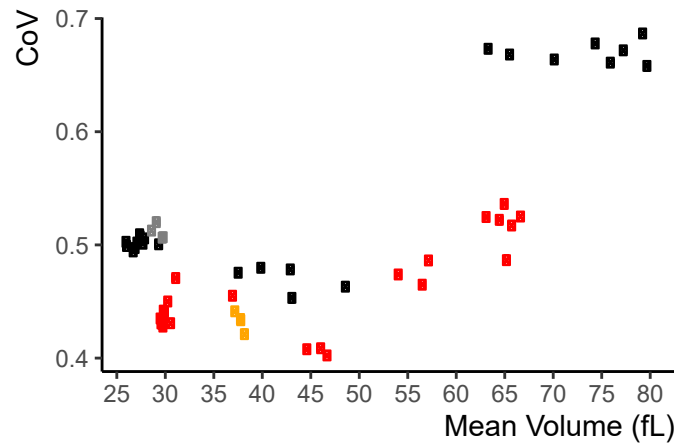**C**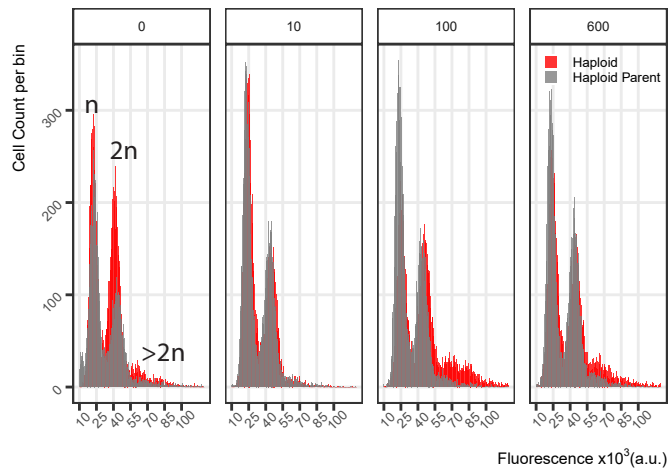

Supplement: supp [file elife-69549-supp-v1.zip]

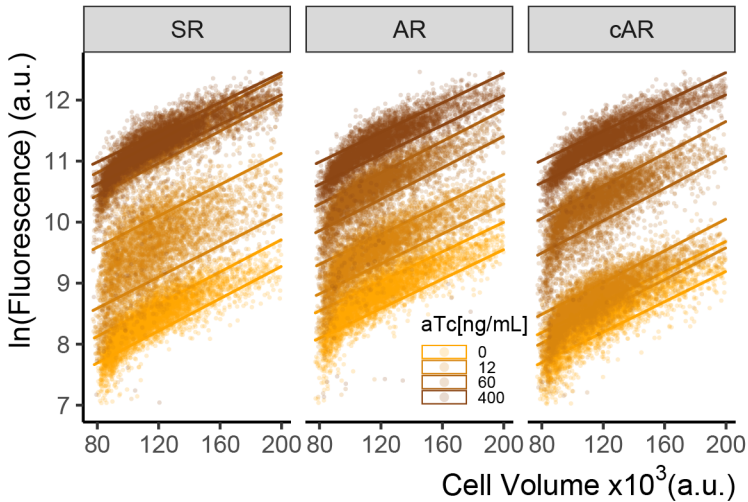

Supplement: supp [file elife-69549-supp-v1.zip]

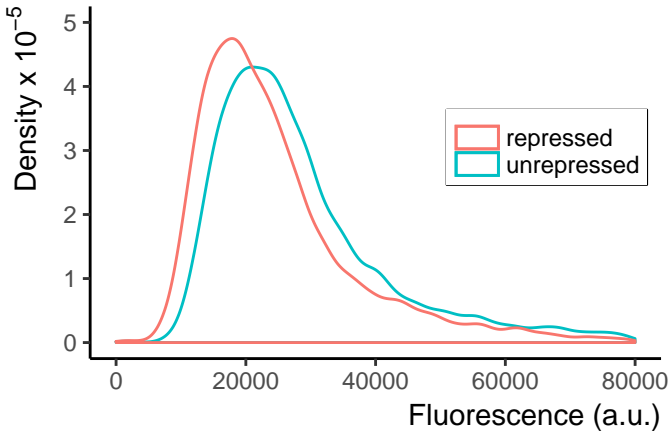

Supplement: supp [file elife-69549-supp-v1.zip]

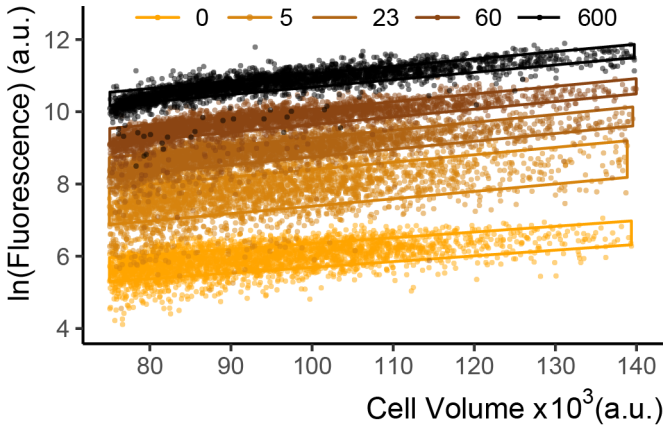

Supplement: supp [file elife-69549-supp-v1.zip]

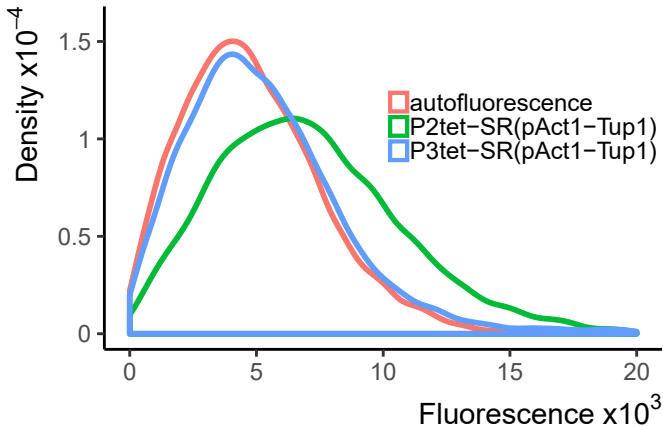

Supplement: supp [file elife-69549-supp-v1.zip]

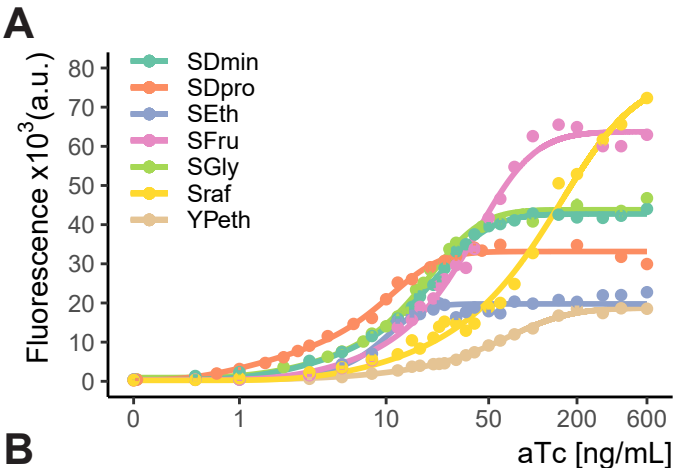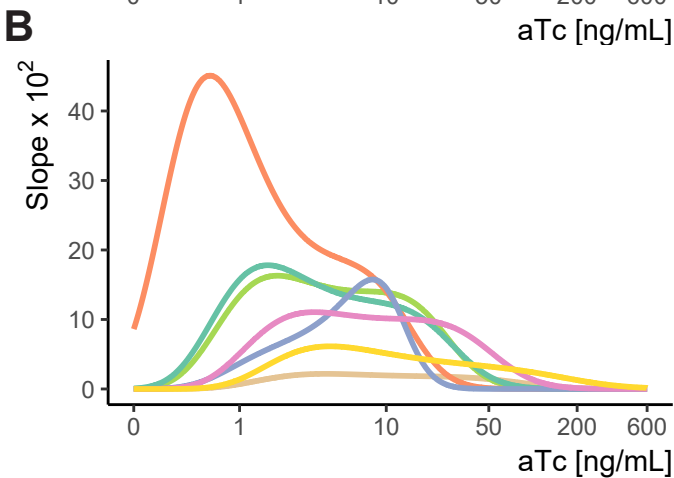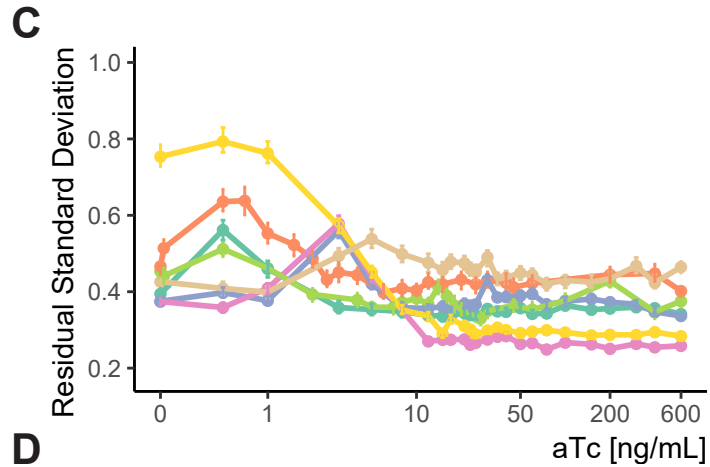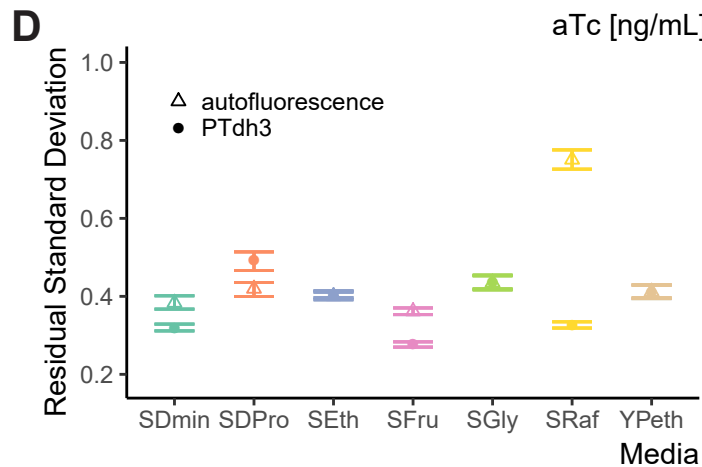

Supplement: supp [file elife-69549-supp-v1.zip]

## SD

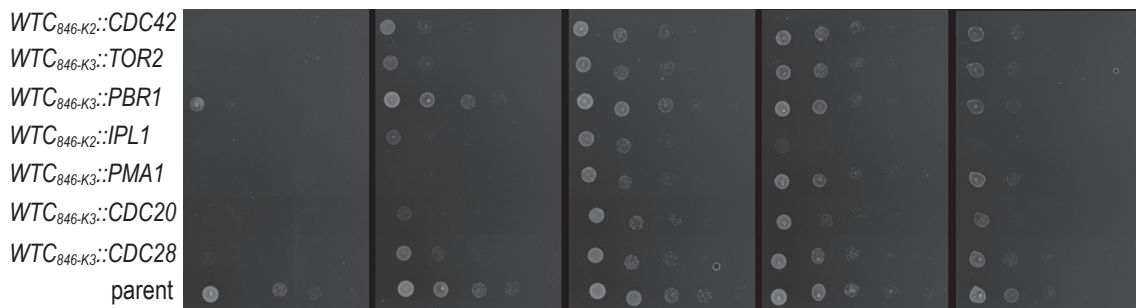

## YPE

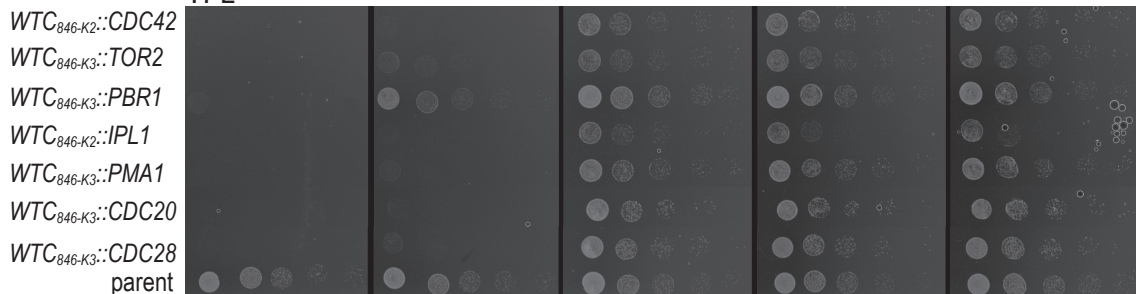

## S Glycerol

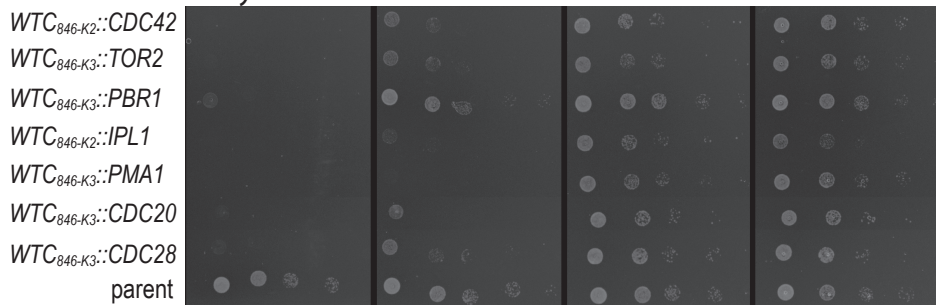

| aTc [ng/mL] | 0 | 10 | 100 | 1000 | 10000 |
|-------------|---|----|-----|------|-------|
|-------------|---|----|-----|------|-------|

## SD Proline

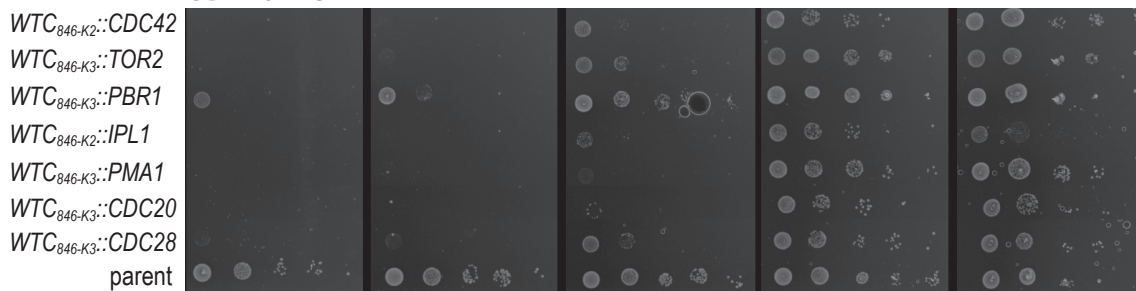

| aTc [ng/mL] | 0 | 1 | 10 | 100 | 1000 |
|-------------|---|---|----|-----|------|
|-------------|---|---|----|-----|------|

Supplement: supp [file elife-69549-supp-v1.zip]

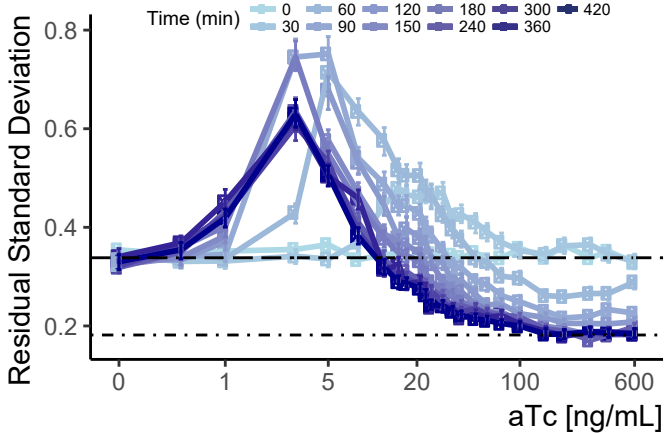

Supplement: supp [file elife-69549-supp-v1.zip]

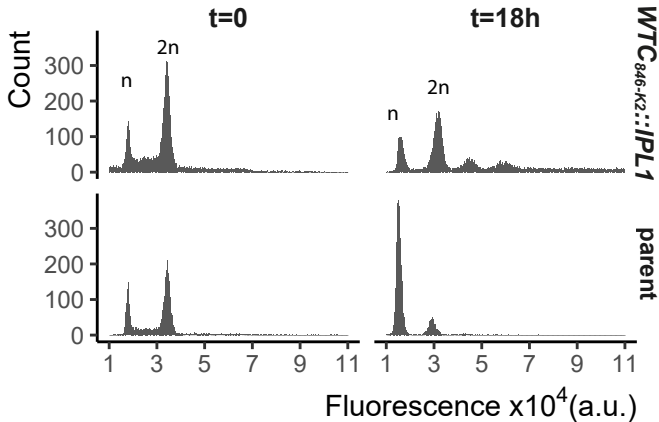

Supplement: supp [file elife-69549-supp-v1.zip]

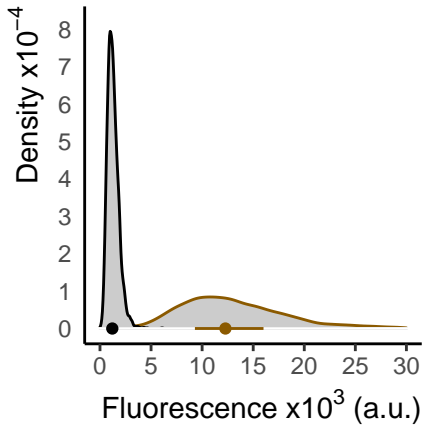

Supplement: supp [file elife-69549-supp-v1.zip]

**A**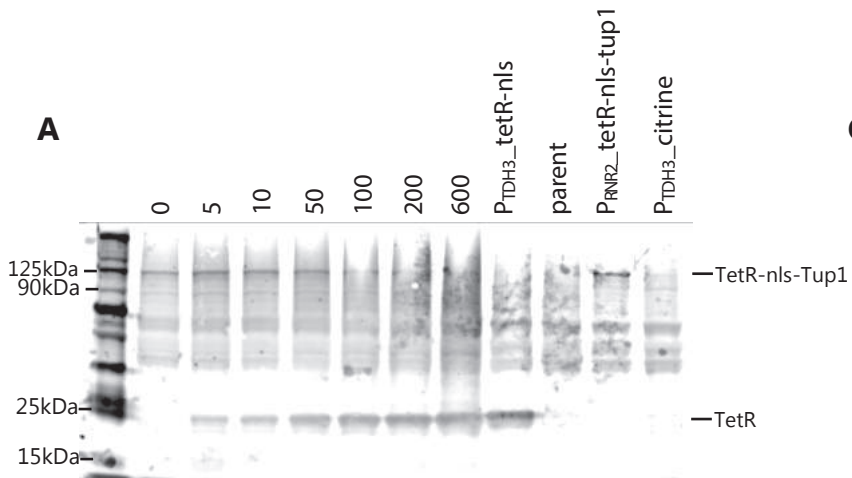**B**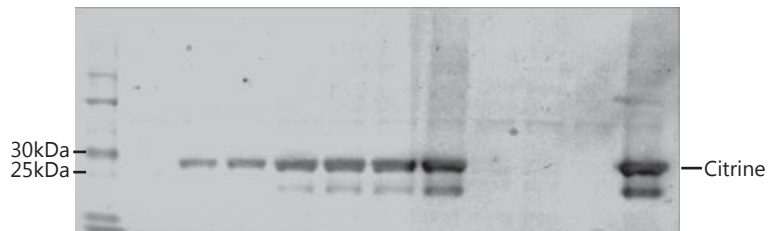**C**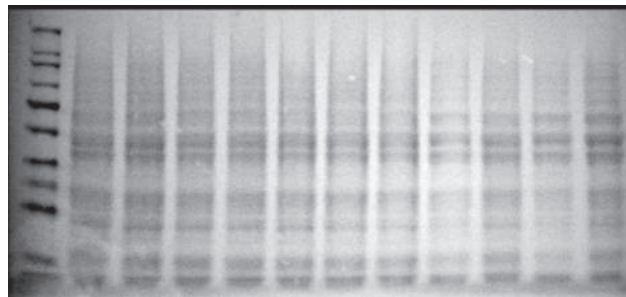**D**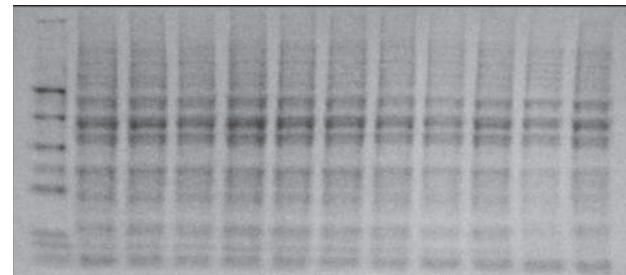

Supplement: supp [file elife-69549-supp-v1.zip]

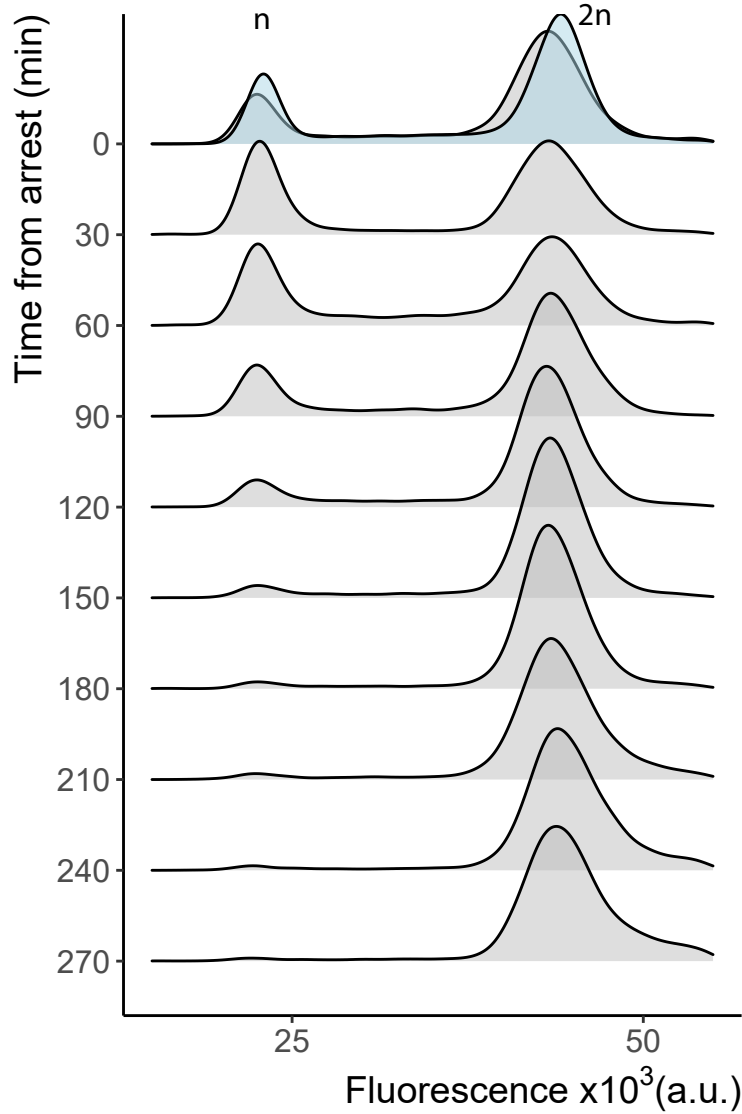

Supplement: supp [file elife-69549-supp-v1.zip]

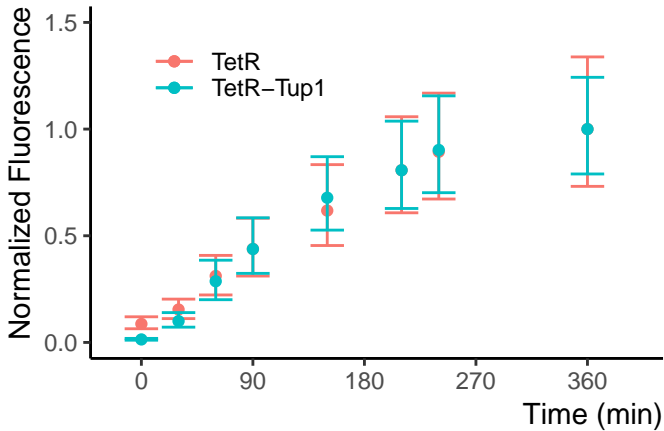

Supplement: supp [file elife-69549-supp-v1.zip]

**A**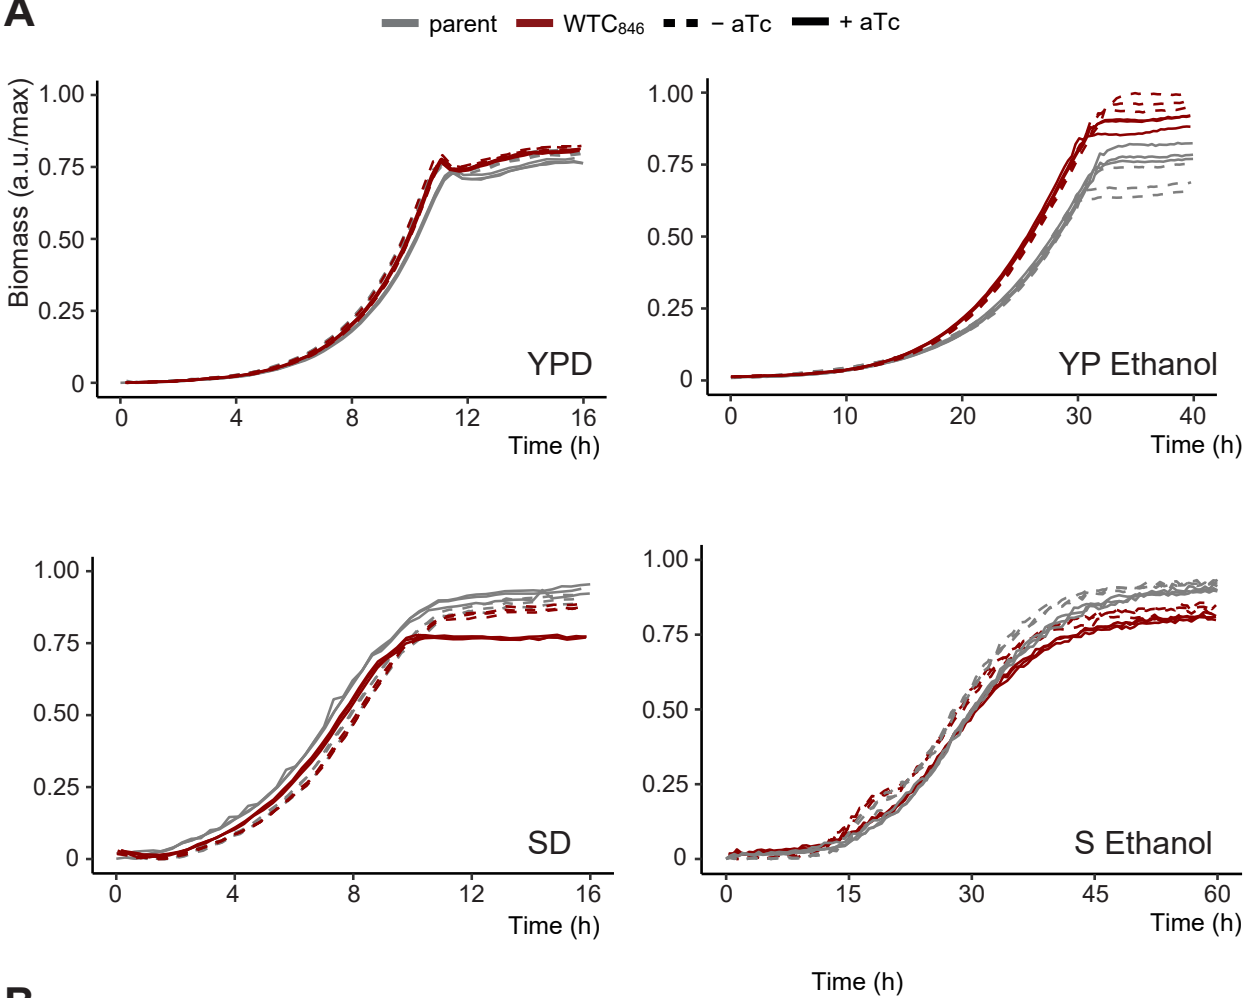**B**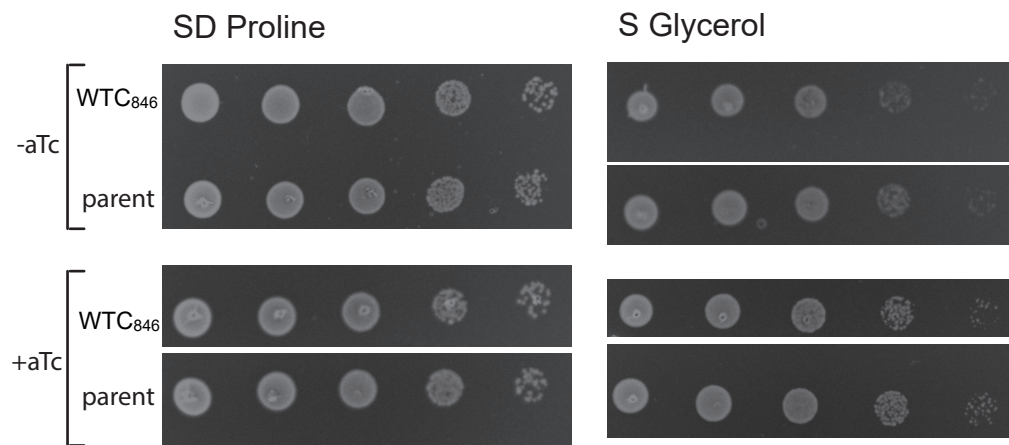

Supplement: supp [file elife-69549-supp-v1.zip]
